# Supplementary material for: Robotic Care Equipment Improves Communication between Care Recipient and Caregiver in a Nursing Home as Revealed by Gaze Analysis: A Case Study
Source: MDPI journal article supplement (doi:10.3390/ijerph21030250), 2024-02-22
Supplement: s1 [file s1]

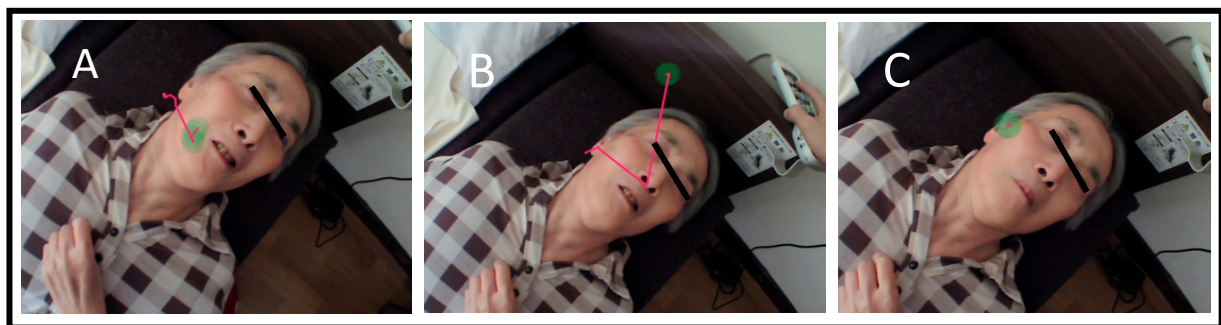

**Figure S1.** Facial expression of the care recipient.

Smiling face (A, B) and usual expression (C) of the care recipient during Resyone separation.
